# Supplementary material for: Long Non-Coding RNA HOTAIR Promotes Cell Migration and Invasion via Down-Regulation of RNA Binding Motif Protein 38 in Hepatocellular Carcinoma Cells
Source: PubMed Central journal article supplement (PMC3975384; doi:10.3390/ijms15034060), 2014-03-06

# Supplementary Information

Figure S1. mRNA-signaling pathway integrated network based on the predicted interactions.

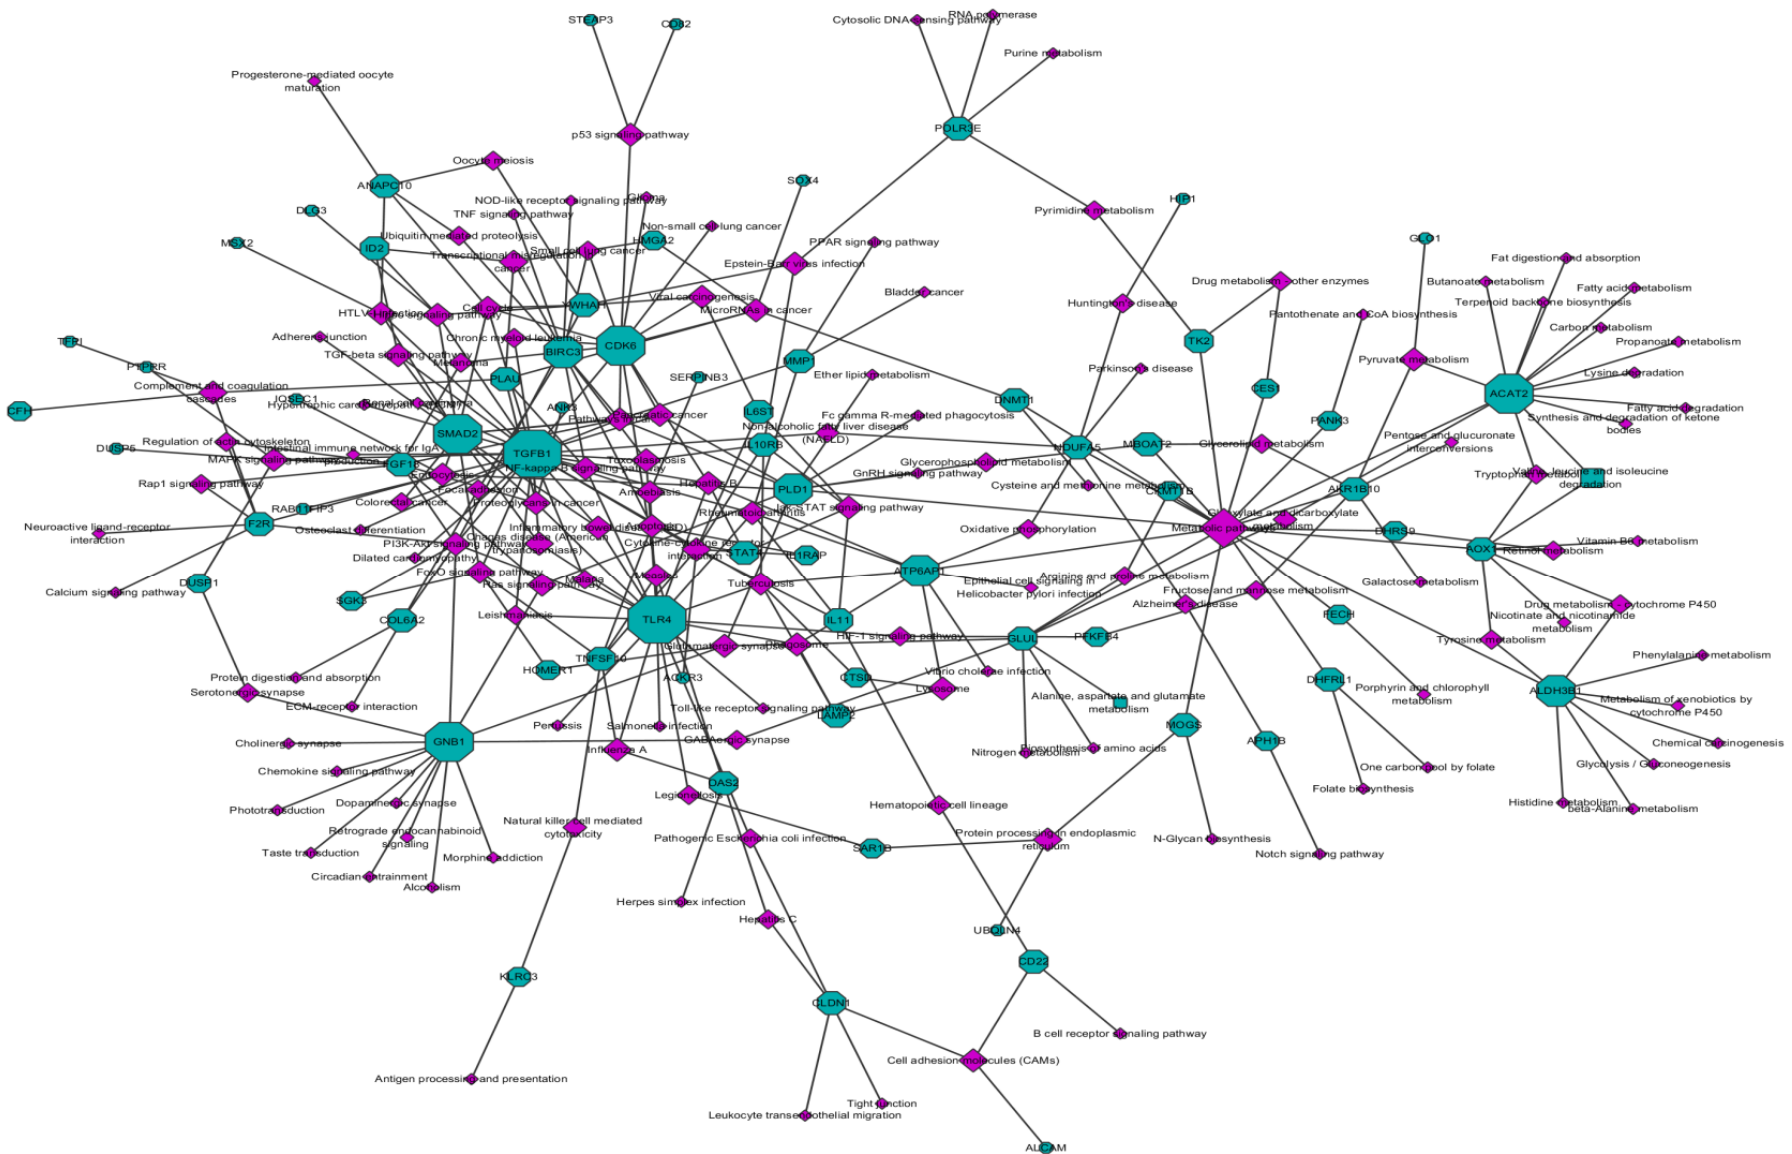

Supplement: ijms-15-04060-s001.pdf [file ijms-15-04060-s001.pdf]
